# Supplementary material
Source: Springer Nature journal article supplement (https://www.springermedizin.de/resource/supplementary/12995_2009_119_MOESM2_ESM.pdf/9622720)

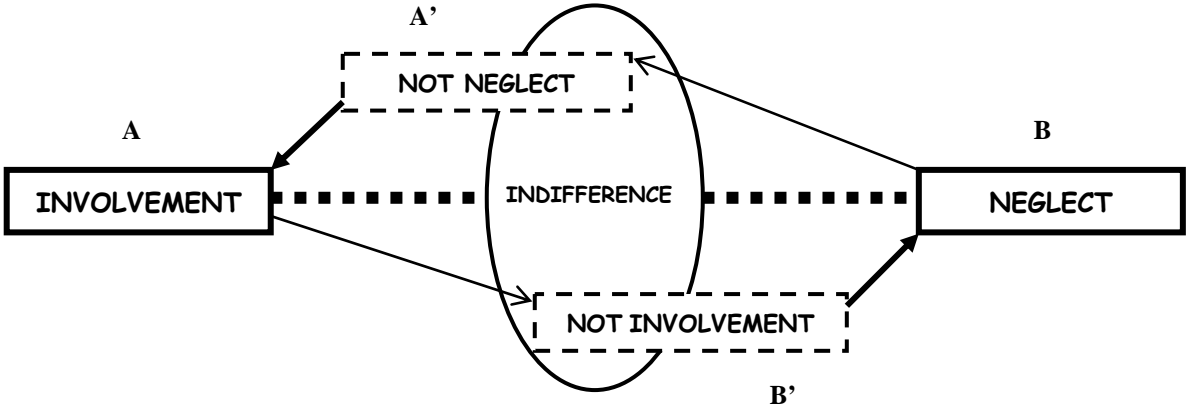

Frenetic  
Type

Underchallenged  
Type

Worn-out  
Type

Supplement: MOESM2 [file 9622720]
